# Supplementary material for: Molecular profiling of 888 pediatric tumors informs future precision trials and data-sharing initiatives in pediatric cancer
Source: PubMed Central journal article supplement (PMC11239876; doi:10.1038/s41467-024-49944-0), 2024-07-11

Supplementary Information for

## **Molecular Profiling of 888 Pediatric Tumors Informs Future Precision Trials and Data Sharing Initiatives in Pediatric Cancer**

\*Suzanne J. Forrest<sup>1,2</sup>, Hersh Gupta<sup>3,4</sup>, Abigail Ward<sup>1</sup>, Yvonne Y. Li<sup>3,4</sup>, Duong Doan<sup>1</sup>, Alyaa Al Ibraheemi<sup>2,5</sup>, Sanda Alexandrescu<sup>2,5</sup>, Pratiti Bandopadhyay<sup>1,2</sup>, Suzanne Shusterman<sup>1,2</sup>, Elizabeth A. Mullen<sup>1,2</sup>, Natalie B. Collins<sup>1,2</sup>, Susan N. Chi<sup>1,2</sup>, Karen D. Wright<sup>1,2</sup>, Priti Kumari<sup>3</sup>, Tali Mazor<sup>3</sup>, Keith L. Ligon<sup>2,3,5,6</sup>, Priyanka Shivdasani<sup>6</sup>, Monica Manam<sup>5</sup>, Laura E. MacConaill<sup>6</sup>, Evelina Ceca<sup>1</sup>, Sidney N. Benich<sup>1</sup>, Wendy B. London<sup>1</sup>, Richard L. Schilsky<sup>7</sup>, Suanna S. Bruinooge<sup>7</sup>, Jaime Guidry Auvil<sup>8</sup>, Ethan Cerami<sup>3</sup>, Barrett J. Rollins<sup>2,3,6</sup>, Matthew L. Meyerson<sup>2,3,4</sup>, Neal I. Lindeman<sup>9</sup>, Bruce E. Johnson<sup>2,3,6</sup>, Andrew D. Cherniak<sup>3,4</sup>, Alanna J. Church<sup>2,5</sup>, \*Katherine A. Janeway<sup>1,2</sup>

\*Corresponding authors

<sup>1</sup>Dana-Farber/Boston Children's Cancer and Blood Disorders Center, Boston, MA, USA

<sup>2</sup>Harvard Medical School, Boston, MA, USA

<sup>3</sup>Dana-Farber Cancer Institute, Boston, MA, USA

<sup>4</sup>Broad Institute of MIT and Harvard, Cambridge, MA, USA

<sup>5</sup>Boston Children's Hospital, Boston, MA, USA

<sup>6</sup>Brigham and Women's Hospital, Boston, MA, USA

<sup>7</sup>American Society of Clinical Oncology, Alexandria, VA, USA

<sup>8</sup>National Cancer Institute, Bethesda, MD, USA

<sup>9</sup>Weill Cornell Medical College, New York, NY, USA

## Table of Contents

|                                                                                                                                                              |          |
|--------------------------------------------------------------------------------------------------------------------------------------------------------------|----------|
| <b>Supplementary Tables</b> .....                                                                                                                            | <b>3</b> |
| Supplementary Table 1: Frequency of Targeted Therapy Matching Variant by Diagnosis Sub-Group.....                                                            | 3        |
| Supplementary Table 2: Activating PIK3CA Gene Alterations and ARID1A Inactivating Alterations Present in Cohort.....                                         | 4        |
| <b>Supplementary Figures</b> .....                                                                                                                           | <b>5</b> |
| Supplementary Figure 1: OncoPrint showing most common oncogenic alterations in the Extracranial solid tumors (n=512) across the entire analytic cohort ..... | 5        |
| Supplementary Figure 2: OncoPrint showing most common oncogenic alterations in the CNS tumors (n=376) across the entire analytic cohort.....                 | 6        |

**Supplementary Table 1. Frequency of Targeted Therapy Matching Variant by Diagnosis Sub-Group**

|                                | <b>Total # of Pts in Group</b> | <b>Matched Pts in Group</b> | <b>Frequency</b> |
|--------------------------------|--------------------------------|-----------------------------|------------------|
| <b>Glioneuronal Tumor</b>      | 19                             | 17                          | 89.47%           |
| <b>High Grade Glioma</b>       | 63                             | 44                          | 69.84%           |
| <b>Pilocytic Astrocytomas</b>  | 51                             | 33                          | 64.71%           |
| <b>Low Grade Glioma</b>        | 79                             | 41                          | 51.90%           |
| <b>Rhabdomyosarcoma</b>        | 44                             | 18                          | 40.91%           |
| <b>CNS Germ Cell Tumor</b>     | 10                             | 4                           | 40.00%           |
| <b>Carcinoma</b>               | 35                             | 11                          | 31.43%           |
| <b>Sarcoma (other)</b>         | 81                             | 22                          | 27.16%           |
| <b>Medulloblastoma</b>         | 55                             | 14                          | 25.45%           |
| <b>Neuroblastoma</b>           | 91                             | 22                          | 24.18%           |
| <b>Osteosarcoma</b>            | 42                             | 10                          | 23.81%           |
| <b>Other (Non-CNS)</b>         | 68                             | 16                          | 23.53%           |
| <b>Meningioma</b>              | 9                              | 2                           | 22.22%           |
| <b>Liver Tumors</b>            | 32                             | 6                           | 18.75%           |
| <b>Non-CNS Germ Cell Tumor</b> | 33                             | 6                           | 18.18%           |
| <b>Other (CNS)</b>             | 51                             | 8                           | 15.69%           |
| <b>Ependymoma</b>              | 39                             | 6                           | 15.38%           |
| <b>Wilms</b>                   | 58                             | 7                           | 12.07%           |
| <b>Ewing</b>                   | 28                             | 2                           | 7.14%            |

## Supplementary Table 2. Activating PIK3CA Gene Alterations and ARID1A Inactivating Alterations Present in Cohort

| Gene   | Protein Change                  | DNA Change                                             | Diagnosis Group            | Diagnosis Name                      |
|--------|---------------------------------|--------------------------------------------------------|----------------------------|-------------------------------------|
| ARID1A | p.Q2037*                        | c.6109C>T                                              | Carcinoma                  | Transitional cell carcinoma         |
| ARID1A | p.R1742Sfs*21                   | c.5226_5249delAACGCTACT<br>GGATCCTGGGAGGTTinsTC        | Carcinoma                  | Adenocarcinoma,<br>metastatic       |
| ARID1A | p.Q543*                         | c.1627C>T                                              | Ewing                      | Ewing sarcoma                       |
| ARID1A | p.Q1552*,<br>p.W1670*           | c.4654C>T, c.5010G>A                                   | High Grade Glioma          | Glioblastoma                        |
| ARID1A | p.Y815*                         | c.2445T>A                                              | High Grade Glioma          | Glioblastoma                        |
| ARID1A | p.G2087E                        | c.6260G>A                                              | Liver Tumors               | Hepatoblastoma                      |
| ARID1A | p.G2087V                        | c.6260G>T                                              | Medulloblastoma            | Medulloblastoma                     |
| ARID1A | p.G277Afs*111                   | c.828_862delIAGGCGGCCCC<br>TCCGCGGCCGCGGGGA<br>ACTCCCC | Neuroblastoma              | Neuroblastoma                       |
| ARID1A | p.E2250Rfs*28                   | c.6746_6747insA                                        | Wilms                      | Wilms Tumor                         |
| ARID1A | p.E1774*                        | c.5320G>T                                              | Wilms                      | Wilms Tumor                         |
| PIK3CA | p.H1047R                        | c.3140A>G                                              | Carcinoma                  | Adenocarcinoma                      |
| PIK3CA | p.E542K                         | c.1624G>A                                              | Carcinoma                  | Transitional cell carcinoma         |
| PIK3CA | p.E542K                         | c.1624G>A                                              | Ependymoma                 | Ependymoma, anaplastic              |
| PIK3CA | p.R38H                          | c.113G>A                                               | High Grade Glioma          | Glioblastoma                        |
| PIK3CA | p.E542K,<br>p.R88Q              | c.1624G>A, c.263G>A                                    | High Grade Glioma          | Astrocytoma anaplastic              |
| PIK3CA | p.R93Q,<br>p.T1025A,<br>p.C378W | c.278G>A, c.3073A>G,<br>c.1134T>G                      | High Grade Glioma          | Glioblastoma                        |
| PIK3CA | p.R88Q,<br>p.Y1021H             | c.263G>A, c.3061T>C                                    | High Grade Glioma          | Glioblastoma                        |
| PIK3CA | p.E545K                         | c.1633G>A                                              | Low Grade Glioma           | Astrocytoma, Low Grade              |
| PIK3CA | p.H1047L                        | c.3140A>T                                              | Medulloblastoma            | Medulloblastoma                     |
| PIK3CA | p.E542K                         | c.1624G>A                                              | Medulloblastoma            | Medulloblastoma                     |
| PIK3CA | p.E545K                         | c.1633G>A                                              | Medulloblastoma            | Medulloblastoma                     |
| PIK3CA | p.E542K                         | c.1624G>A                                              | Non-CNS Germ Cell<br>Tumor | Germinoma                           |
| PIK3CA | p.H1047R                        | c.3140A>G                                              | Other (CNS)                | CNS embryonal tumor                 |
| PIK3CA | p.E545K                         | c.1633G>A                                              | Other (Non-CNS)            | Epithelioid<br>hemangioendothelioma |
| PIK3CA | p.E545K                         | c.1633G>A                                              | Rhabdomyosarcoma           | Embryonal<br>rhabdomyosarcoma       |
| PIK3CA | p.C420R                         | c.1258T>C                                              | Sarcoma (other)            | Myxoid liposarcoma                  |
| PIK3CA | p.C420R                         | c.1258T>C                                              | Wilms                      | Wilms Tumor                         |
| PIK3CA | p.N1044Y,<br>p.M1043I           | c.3130A>T, c.3129G>T                                   | Wilms                      | Wilms Tumor                         |

**Supplementary Figure 1.** OncoPrint showing most common oncogenic alterations in the Extracranial solid tumors (n=512) across the entire analytic cohort

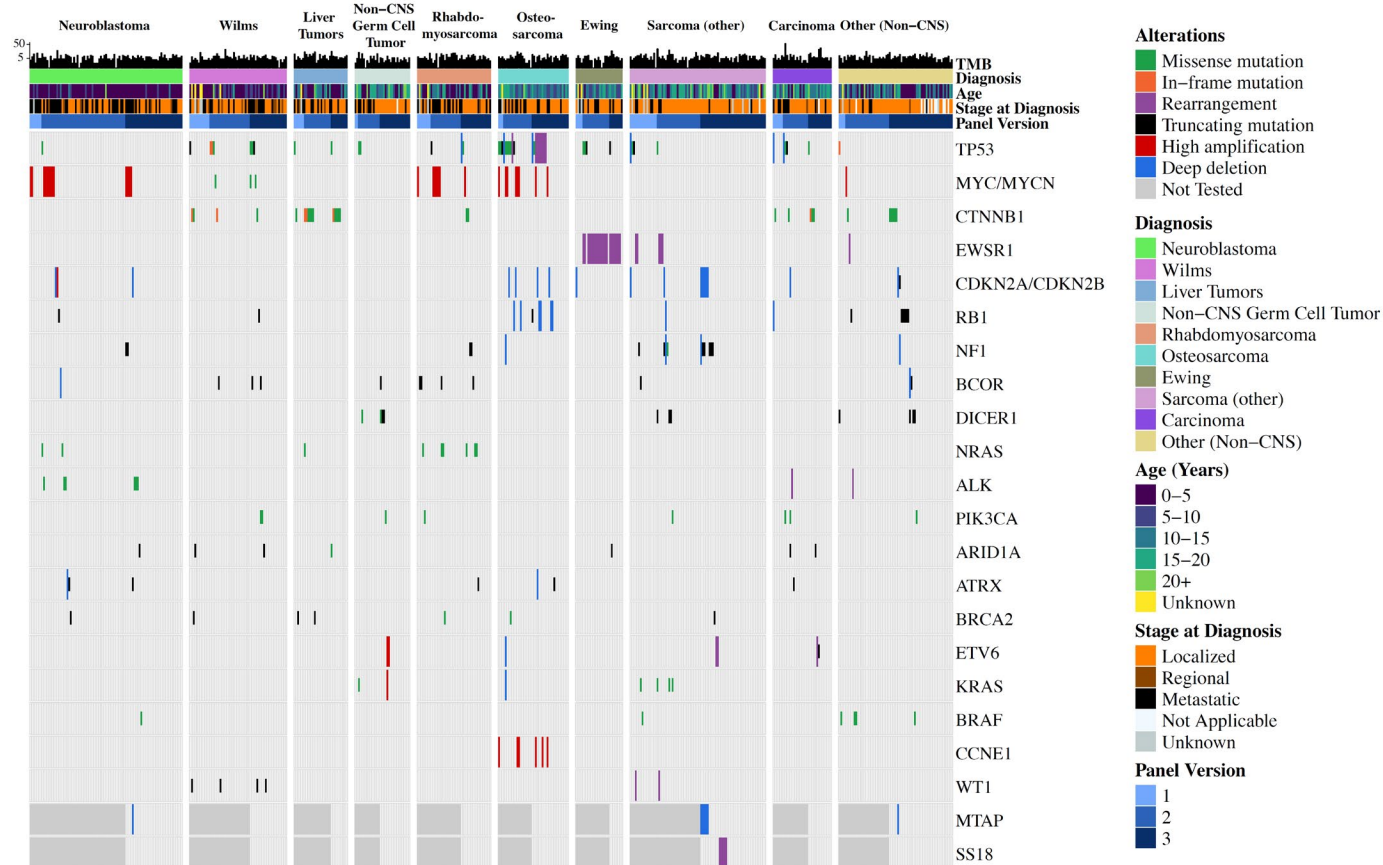

**Supplementary Figure 2.** OncoPrint showing most common oncogenic alterations in the CNS tumors (n=376) across the entire analytic cohort

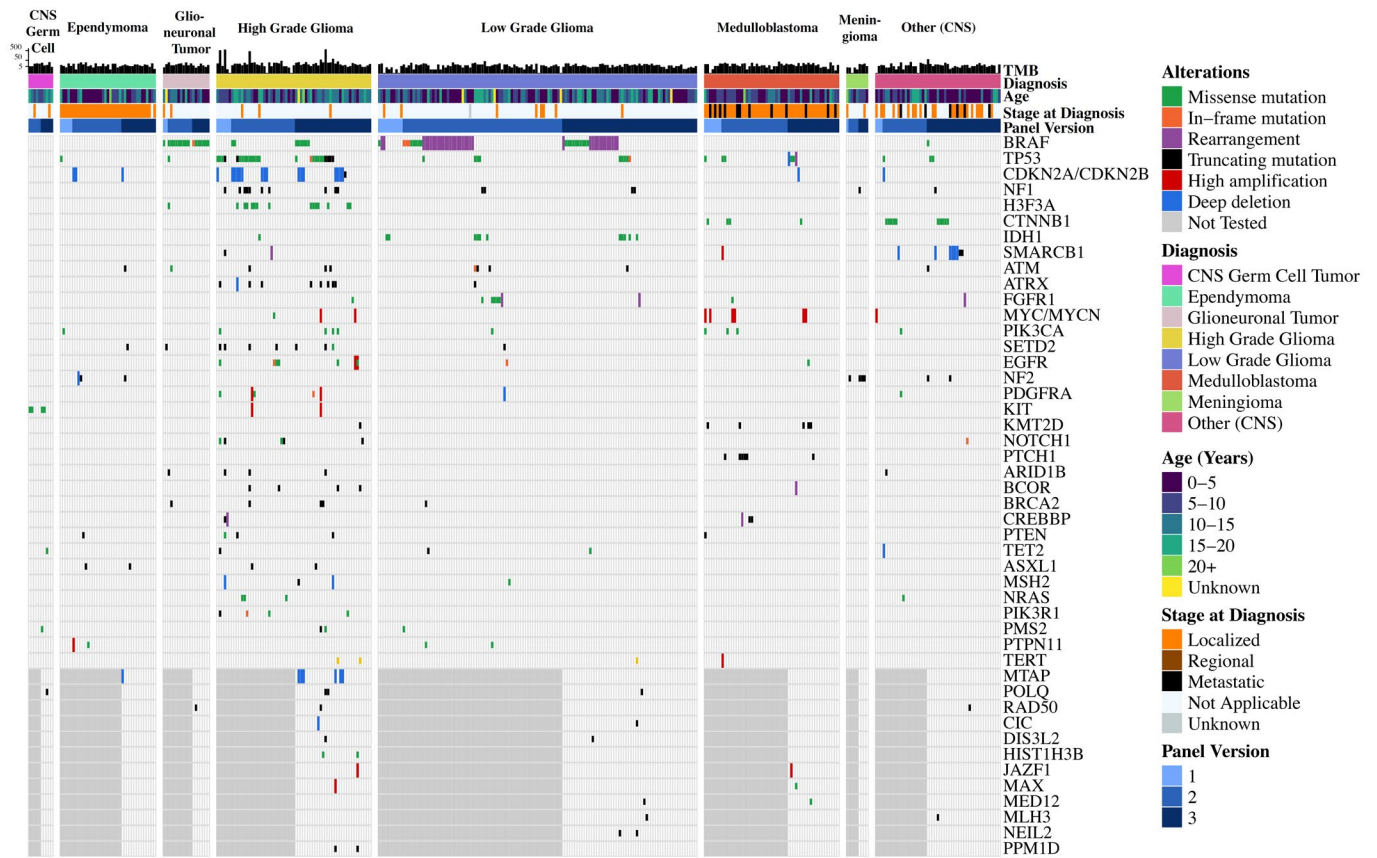

Supplement: 41467_2024_49944_MOESM1_ESM.pdf [file 41467_2024_49944_MOESM1_ESM.pdf]
